# Supplementary material for: Household Size and Age-Modified Patterns of Cardiometabolic Biomarkers and Lifestyle Behaviors: KNHANES 2015–2024
Source: Research Square preprint supplement (doi:10.21203/rs.3.rs-8857205/v1), 2026-02-18
Supplement: Supplementary file 1 [file 6198e074b6e662a8ea0d115e.docx]

Table S1. IRB approval number

| **KNHANES cycle** | **Survey year(s) covered** | **Year within cycle** | **IRB approval number (KCDC/KDCA)** | **Note** |
| --- | --- | --- | --- | --- |
| 6th | 2015 | 3rd | Not reviewed (*) | Waiver/IRB review not required |
| 7th | 2016–2018 | 1st | Not reviewed (*) | Waiver/IRB review not required |
| 7th | 2016–2018 | 2nd | Not reviewed (*) | Waiver/IRB review not required |
| 7th | 2018 | 3rd | 2018-01-03-P-A | IRB review resumed |
| 8th | 2019–2021 | 1st | 2018-01-03-C-A |  |
| 8th | 2019–2021 | 2nd | 2018-01-03-2C-A |  |
| 8th | 2019–2021 | 3rd | 2018-01-03-5C-A |  |
| 9th | 2022–2024 | 1st | 2018-01-03-4C-A |  |
| 9th | 2022–2024 | 2nd | 2022-11-16-R-A |  |
| 9th | 2022–2024 | 3rd | 2022-11-16-R-03 |  |
| (*) In these years, the survey was conducted without IRB review based on the IRB committee’s determination, as permissible under the Bioethics and Safety Act (Article 2(1)) and its Enforcement Rule (Article 2(2), subparagraph 1) for government-led research conducted for the public welfare; IRB review was resumed from 2018 in consideration of biospecimen collection and provision of raw data to third parties. | | | | |
